# Supplementary material
Source: Royal Society of Chemistry journal article supplement (doi:10.1039/d6cc02276f)
Supplement: d6cc02276f1.pdf [file d6cc02276f1.pdf]

## Supporting Information

### **Alkaline-earth carbonate-supported Ru for quinoline hydrogenation: enhanced H<sub>2</sub> activation via electronic metal-support interaction**

Yajing Han,<sup>a</sup> Pengfei Huang,<sup>a</sup> Xinkang Cui,<sup>b</sup> Quan Liu,<sup>b</sup> Qinggan Zeng,<sup>b</sup> Peixu Yang<sup>\*b</sup> and Liqiang Wang<sup>\*b</sup>

<sup>a</sup> College of Advanced Interdisciplinary Science and Technology (CAIST), Henan University of Technology, Zhengzhou 450001,

<sup>b</sup> School of Material Science and Engineering, Zhengzhou University, Zhengzhou, Henan 450001, P. R. China.

\* Corresponding authors

Email addresses: yangpx@zzu.edu.cn (X. Yang); wangliqiang@zzu.edu.cn (L. Wang)

## **1. Methods**

### **1.1 Materials**

Anhydrous ruthenium(III) chloride ( $\text{RuCl}_3$ , 99.5%), quinoline and substituted quinolines (analytical grade), and alkaline-earth carbonates (e.g.,  $\text{CaCO}_3$  (99%),  $\text{MgCO}_3$  (98%), and  $\text{BaCO}_3$  (99%)) were purchased from Shanghai Aladdin Reagent Co., Ltd. Eggshells were obtained from a local supermarket. Commercial 5 wt% Ru/C (AR grade) was purchased from Shanghai Haohong Biomedical Technology Co., Ltd. Sodium borohydride ( $\text{NaBH}_4$ , 97%) was obtained from Tianjin Heowns Biochemical Technology Co., Ltd. Unless otherwise stated, all reagents were used as received without further purification.

### **1.2 Preparation of Catalysts**

#### **Preparation of RuNPs**

To a  $\text{RuCl}_3$  solution ( $1 \text{ mg mL}^{-1}$ ),  $\text{NaBH}_4$  solution was added dropwise ( $\text{NaBH}_4$ :Ru in  $\text{RuCl}_3$ :2:1). After stirring for 3 h, the product was collected by centrifugation, washed with ethanol, and redispersed in ethanol for storage. The resulting sample was denoted as Ru NPs and was ultrasonicated for 5 min before use.

#### **Preparation of Ru/ $\text{CaCO}_3$**

Ru/ $\text{CaCO}_3$  was prepared by an impregnation method with a nominal Ru loading of  $\sim 0.5 \text{ wt}\%$ . Briefly, 1 g of  $\text{CaCO}_3$  powder was dispersed in 15 mL of water and stirred for 30 min. 4.1 mL of  $\text{RuCl}_3$  solution ( $5 \text{ mg mL}^{-1}$ ) was added dropwise, followed by stirring for 30 min. Subsequently, 0.2 g of  $\text{NaBH}_4$  was dissolved in 10 mL of water and added dropwise to the above mixing solution; the mixture was stirred for 3 h. The solid was collected by filtration, washed with water, and dried under vacuum. The obtained solid was then calcined at  $300 \text{ }^\circ\text{C}$  for 2 h under  $\text{N}_2$  protection.

Ru/ $\text{MgCO}_3$ , Ru/ $\text{BaCO}_3$ , and Ru/EggShell were prepared using a similar procedure, except that the supports were replaced with  $\text{MgCO}_3$ ,  $\text{BaCO}_3$ , and egg shell (ground into powder), respectively; all other conditions were the same.

### 1.3 Characterization

X-ray diffraction (XRD) patterns were recorded on a Bruker D8 diffractometer using Cu K $\alpha$  radiation. Scanning electron microscopy (SEM) images were acquired on a Helios NanoLab 600i microscope. Transmission electron microscopy (TEM) was performed on an FEI Talos instrument operated at 200 kV. X-ray photoelectron spectroscopy (XPS) spectra were collected on a Thermo ESCALAB 250 equipped with Al K $\alpha$  radiation. Metal loadings were quantified by inductively coupled plasma–optical emission spectroscopy (ICP–OES) using a Thermo ESCALAB 250Xi. N<sub>2</sub> adsorption–desorption isotherms were measured at 77 K on a Micromeritics ASAP 2020 analyzer. Conversion and selectivity in nitro-compound hydrogenation were determined by HPLC (Shimadzu LC-20AD). H<sub>2</sub>–D<sub>2</sub> isotopic exchange experiments were conducted as follows: For gas–liquid–solid three-phase hydrogen–deuterium exchange experiments conducted in a high-pressure reactor, the catalyst and substrate were loaded into the reactor, which was then sealed and purged with an inert gas to remove air. High-purity H<sub>2</sub> or D<sub>2</sub> was subsequently introduced to the desired pressure, and the reaction was initiated under constant-temperature stirring to ensure efficient gas–liquid–solid contact. Samples were collected at predetermined time points using an online sampling valve or after controlled depressurization. Kinetic profiles for H<sub>2</sub> and D<sub>2</sub> were constructed by plotting reaction conversion or product concentration as a function of time. The isotope effect was then evaluated by comparing the initial rates or steady-state values. The H<sub>2</sub>-TPD experiment is carried out as follows. The catalyst is loaded into a quartz tube reactor and pretreated at 300°C under an inert gas flow for 50 minutes to remove surface impurities. After cooling to room temperature, a mixed Ar/H<sub>2</sub> gas is introduced for 1 hour to achieve saturated adsorption. Then, the system is switched back to an inert gas to remove physically adsorbed H<sub>2</sub>. Finally, the temperature is linearly increased to 600°C at a constant heating rate, while the desorbed H<sub>2</sub> signal is continuously monitored using a thermal conductivity detector.

### 1.4 Hydrogenation performance evaluation

The chemoselective hydrogenation of quinoline was evaluated in a batch stainless-steel autoclave equipped with magnetic stirring. In a typical run, quinoline, catalyst, and solvent were charged into a 15 mL autoclave. Then the autoclave was purged with H<sub>2</sub> several times to remove air, and finally pressurized to 4 bar with H<sub>2</sub>. The autoclave was placed in a heating mantle and maintained at 70 °C for 4 h with stirring at 800 r/min. After reaction, the reactor was cooled to room temperature and depressurized. After the reaction, the liquid phase was filtered and analyzed by HPLC.

Recycling tests were conducted by centrifugation to recover the catalyst from the reaction mixture, followed by three washing cycles with alternating water and ethanol, and vacuum drying. The recovered catalyst was reused under identical reaction conditions.

### **1.5 DFT calculation**

The present first-principles calculations are performed using the projector augmented wave (PAW) method within DFT. The exchange functional is treated using the generalized gradient approximation (GGA) of Perdew-Burke-Ernzerhof (PBE) functional. The cut-off energy of the plane-wave basis is set to 400 eV for atom-optimization calculations. The vacuum spacing in a direction perpendicular to the plane of the catalyst is at least 15 Å. The Brillouin zone integration is performed using  $2 \times 2 \times 1$  Monkhorst and Pack k-point sampling for surface structure. The self-consistent calculations apply a convergence energy threshold of  $10^{-5}$  eV. The maximum Hellmann-Feynman force for each ionic optimization step is 0.05 eV/Å.

## **2. Figures and Tables**

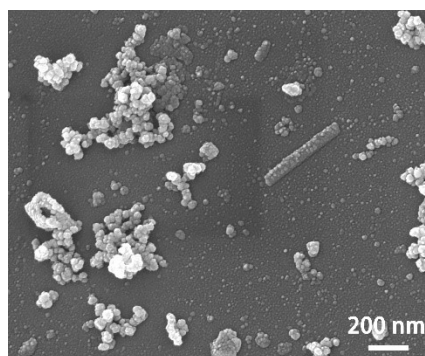

**Fig. S1.** Scanning electron microscopy (SEM) images of Ru/CaCO<sub>3</sub>

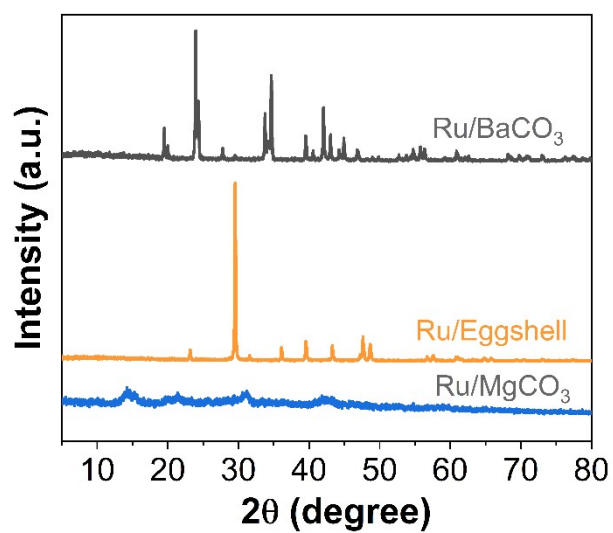

**Fig. S2.** XRD patterns of Ru/MgCO<sub>3</sub>, Ru/BaCO<sub>3</sub>, and Ru/eggshell.

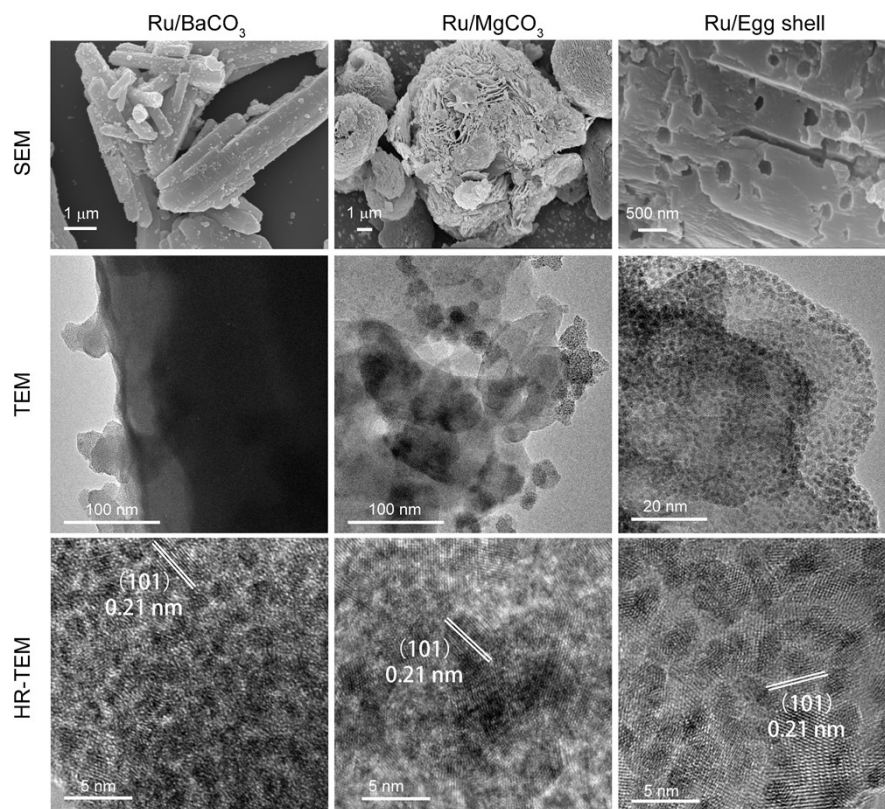

**Fig. S3** SEM and TEM characterization of Ru/MgCO<sub>3</sub>, Ru/BaCO<sub>3</sub>, and Ru/eggshell.

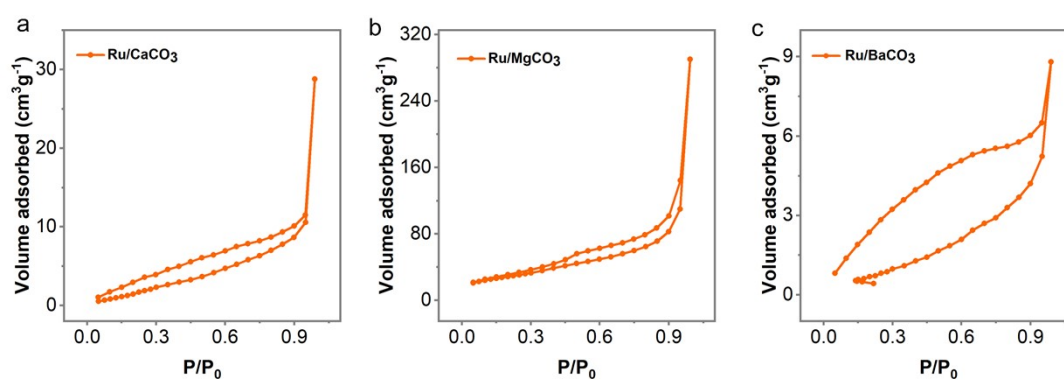

**Fig.S4** N<sub>2</sub> adsorption-desorption isotherms of alkaline-earth carbonates supported Ru.

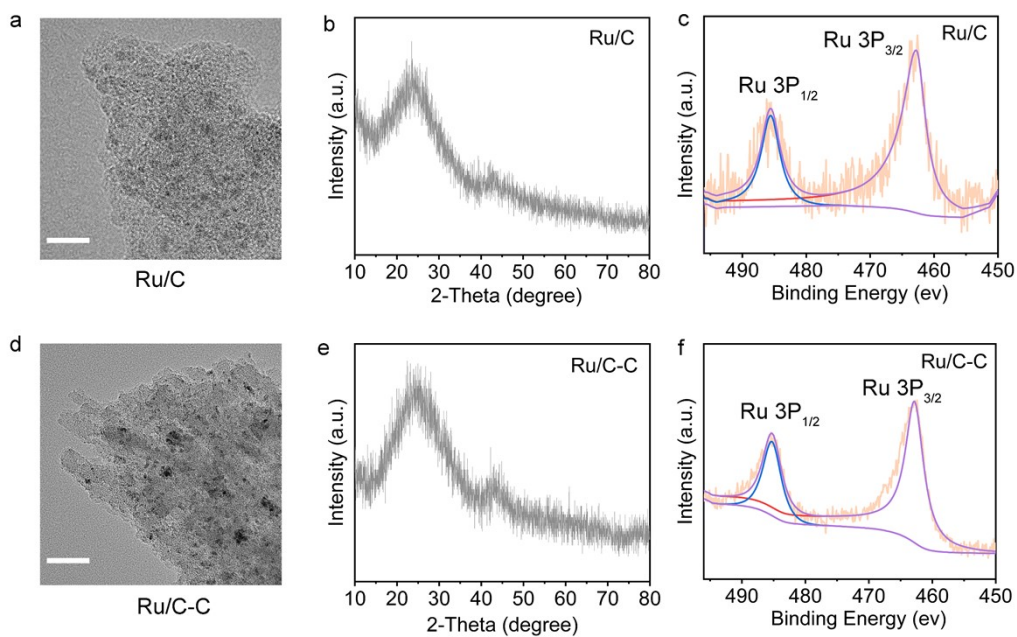

**Fig. S5** (a,b) TEM images, (b,e)XRD patterns, and (c,f) Ru 3p spectrum of Ru/C (in-house made) and Ru/C-C (commercially available).

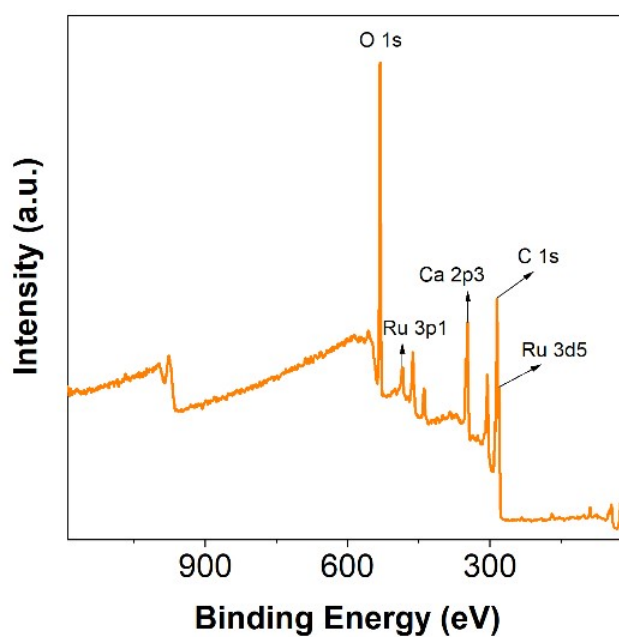

**Fig. S6** XPS spectra of Ru/CaCO<sub>3</sub>.

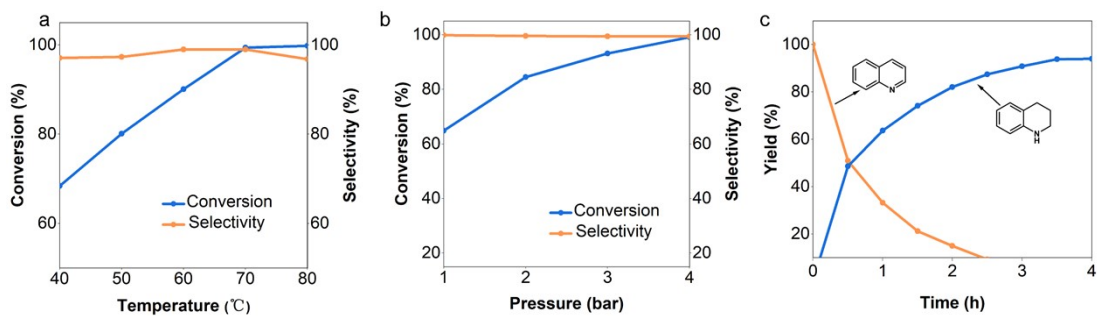

**Fig. S7** Effects of (a) temperature, (b) H<sub>2</sub> pressure, and (c) reaction time on the conversion of quinoline and selectivity of 1,2,3,4-tetrahydroquinolines (THQs).

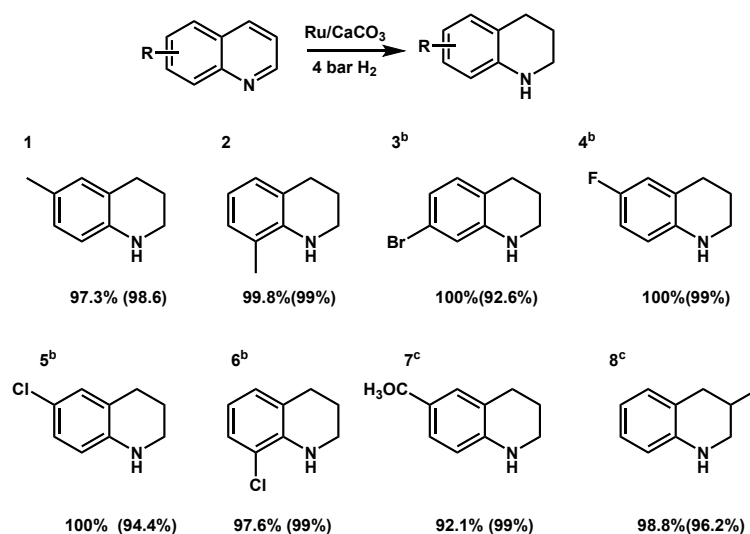

**Fig. S8** Hydrogenation of various *N*-heteroarenes catalyzed by Ru/CaCO<sub>3</sub>. Reaction conditions: 30 mg substrate with 20 mg Ru/CaCO<sub>3</sub>, 4 mL solvent, 70 °C, 4 bar H<sub>2</sub>, 4 h.

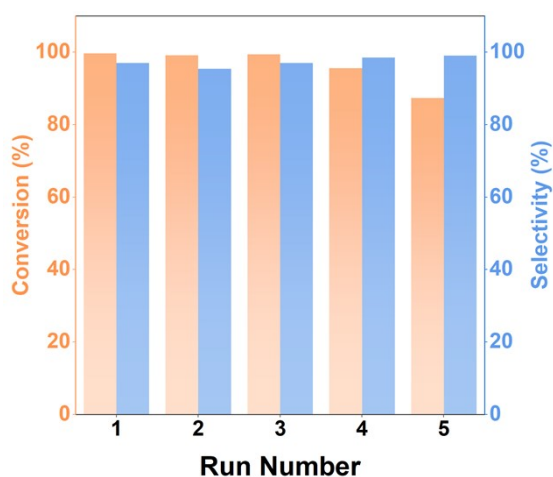

**Fig. S9** Recycling experiment of Ru/CaCO<sub>3</sub>

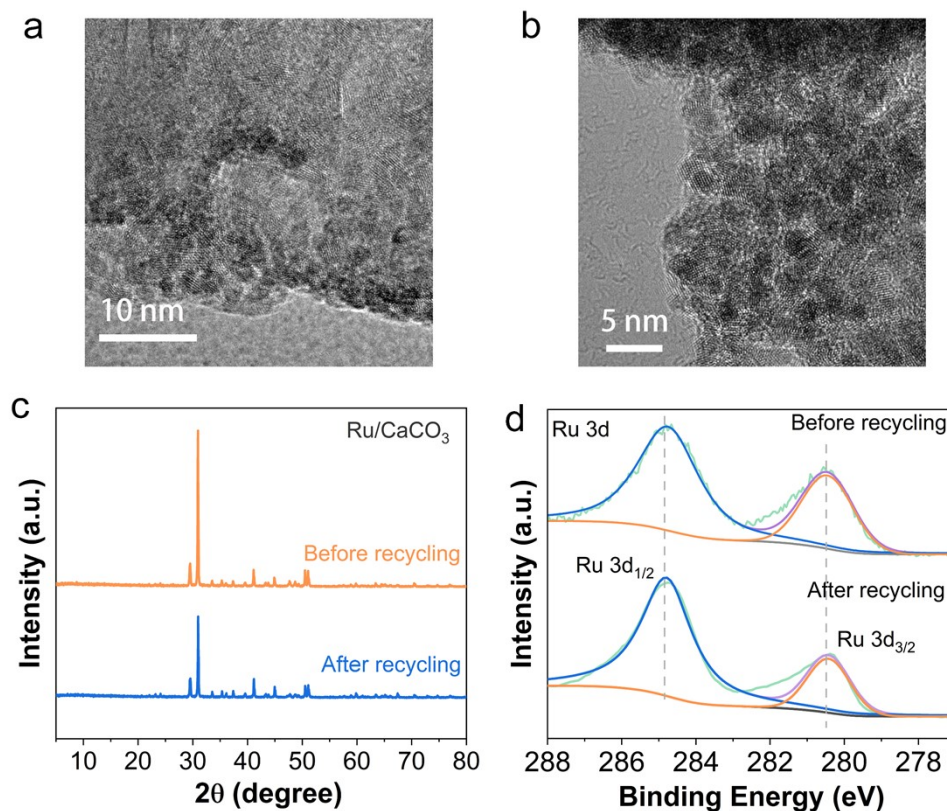

**Fig. S10** Representative characterization of the reused Ru/CaCO<sub>3</sub>: (a, b) TEM images, (c) XRD patterns, and (d) XPS spectra collected before and after five reaction cycles.

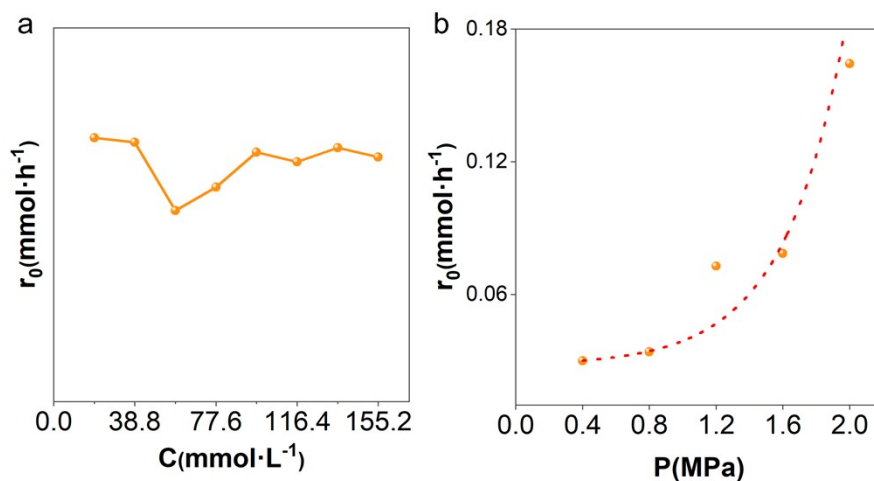

**Fig. S11** (a) Influence of the concentration of quinoline (70 °C, 4 bar of H<sub>2</sub>, 20 mg Ru/CaCO<sub>3</sub>) and (b) the H<sub>2</sub> pressure (70 °C, 30 mg quinoline, and 20 mg Ru/CaCO<sub>3</sub>) on the initial hydrogenation reaction rate.

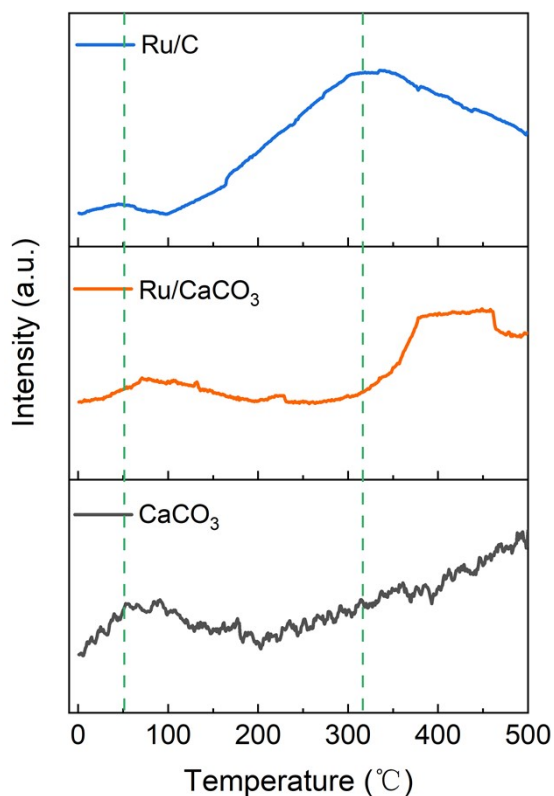

**Fig. S12** CO<sub>2</sub>-TPD of different supported Ru-based catalysts: CO<sub>2</sub> desorption below 100 °C is generally associated with physical adsorption, whereas the signals observed at 300–500 °C are typically attributed to chemically adsorbed CO<sub>2</sub>. The CaCO<sub>3</sub>-supported system exhibits a higher desorption temperature, suggesting stronger CO<sub>2</sub>-surface interactions.

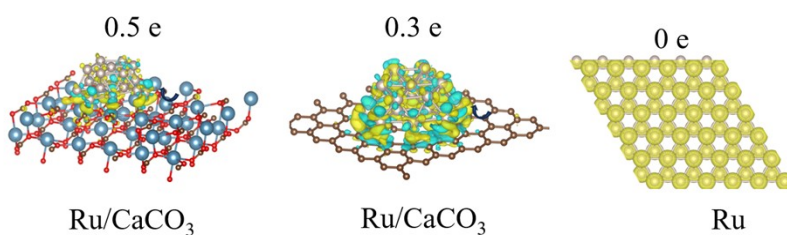

**Fig. S13** charge-difference density of Ru/CaCO<sub>3</sub>, Ru/C, and Ru.

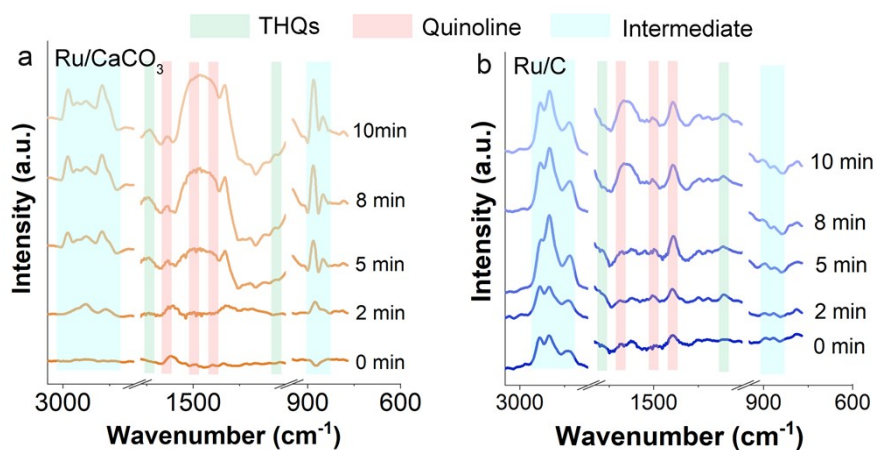

**Fig. S14.** In situ DRIFTS spectra of adsorbed quinoline on (a) Ru/CaCO<sub>3</sub> and (b) Ru/C as a function of time under flowing H<sub>2</sub>.

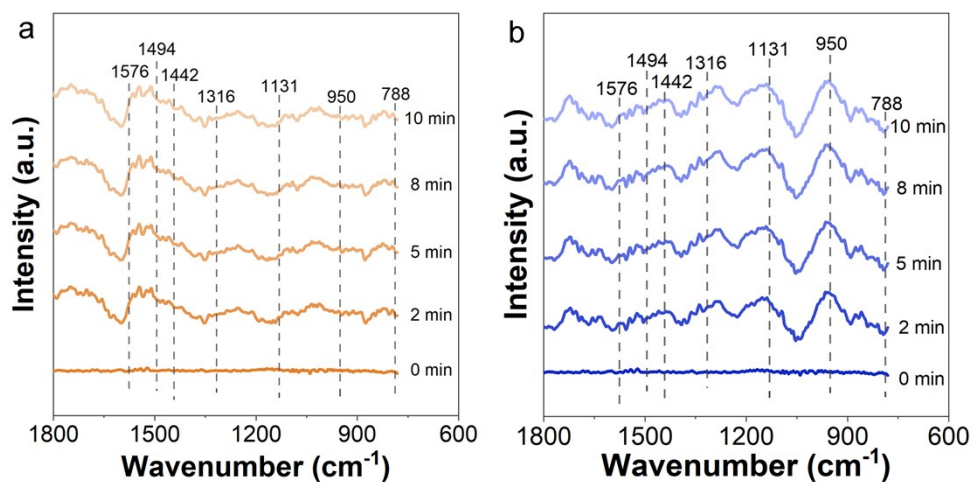

**Fig. S15** Time-dependent quinoline adsorption on catalysts: (a) CaCO<sub>3</sub>; (b) C.

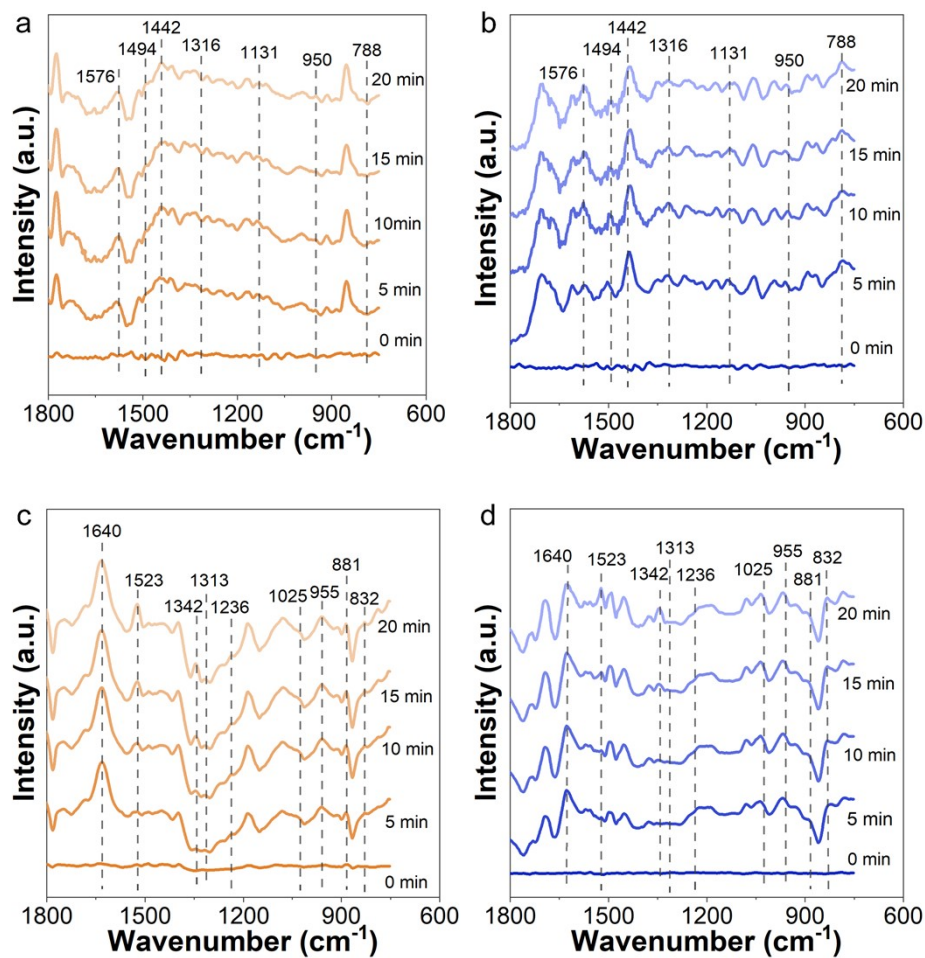

**Fig. S16** Time-dependent quinoline adsorption on catalysts: (a) Ru/CaCO<sub>3</sub>; (b) Ru/C, and THQs adsorption on catalysts: (c) Ru/CaCO<sub>3</sub>; (d) Ru/C.

**Table S1.** Loading amounts of Ru in different catalysts determined by ICP-OES.

| Catalysts            | Element | Content(wt%) |
|----------------------|---------|--------------|
| Ru/CaCO <sub>3</sub> | Ru      | 1.80         |
| Ru/C                 | Ru      | 1.87         |
| Ru/C-C               | Ru      | ~5           |
| Ru/BaCO <sub>3</sub> | Ru      | 1.96         |
| Ru/MgCO <sub>3</sub> | Ru      | 1.98         |

**Table S2.** Comparison of the Catalytic Performance of Representative catalysts for quinoline hydrogenation.

| Catalyst                                                   | H <sub>2</sub><br>(bar) | T<br>(°C) | Time<br>(h) | Con.<br>(%) | Sel.<br>(%) | Ref.                                       |
|------------------------------------------------------------|-------------------------|-----------|-------------|-------------|-------------|--------------------------------------------|
| Ru/CaCO <sub>3</sub>                                       | 4                       | 70        | 4           | 99.9        | 99.9        | This work                                  |
| Ru/C                                                       | 4                       | 70        | 4           | 84.4        | 96.1        | This work                                  |
| Ru NPs                                                     | 4                       | 70        | 4           | 30.5        | 99.9        | This work                                  |
| Ru/MgCO <sub>3</sub>                                       | 4                       | 70        | 4           | 98.0        | 99.9        | This work                                  |
| Ru/BaCO <sub>3</sub>                                       | 4                       | 70        | 4           | 93.1        | 99.9        | This work                                  |
| Pd/HS-NH <sub>2</sub>                                      | 20                      | 100       | -           | 92.6        | 99.9        | Catal. Sci. Technol. 2017, 7, 2221.        |
| Pd/CN                                                      | 10                      | 50        | 10          | 97.1        | 96.6        | New J. Chem. 2018, 42, 16694.              |
| Pd <sub>SA+NC</sub> /TiC                                   | 20                      | 60        | 6           | 99          | 99          | Nano Lett. 2024, 24, 12666-12675.          |
| Pd/NMC-X                                                   | 4                       | 40        | 2           | 99.9        | 99          | ACS Appl. Nano Mater. 2024, 7, 22895.      |
| Pd/PZs                                                     | 1.5                     | 40        | 4           | 98.9        | 98.5        | Catalysts, 2024, 14, 345.                  |
| Pd/CN-1.0-A                                                | 4                       | 30-60     | 1.5         | 99.9        | 99.9        | Appl. Catal. A: Gen. 2025, 706, 120493.    |
| PtRuNi/C                                                   | 50                      | 60        | 1           | 99.9        | 99.9        | J. Alloys Compd. 2020, 834, 155203.        |
| Pt/CeO <sub>2</sub>                                        | 20                      | 60        | 5           | 99          | 99          | J.Catal. 2018, 359, 101.                   |
| PtNW                                                       | 1                       | 80        | -           | 97.9        | 94.1        | ChemCatChem 2013, 5, 2183.                 |
| Pt <sub>AD</sub> /C-Al <sub>2</sub> O <sub>3</sub>         | 20                      | 120       | 2.5         | 99.6        | 99.3        | Chem. Eng. J. 2024, 481, 148706            |
| PtMnAlNPore                                                | 8                       | 120       | 12          | 92          | 100         | J. Mater. Chem. A. 2025, 13, 11540.        |
| IL <sub>PEG1000-PF6-</sub><br>Pt <sub>nano</sub>           | 30                      | 130       | 1.5         | 99          | 99          | J. Chem. Res. 2025, 49, 17475198241311697. |
| Rh NP                                                      | 30                      | 80        | 15-48       | 71          | 99          | Angew. Chem. Int. Ed. 2016, 55, 292.       |
| Rh/PEG4000                                                 | 30                      | 100       | 3           | 98          | 99          | Appl. Catal. A: Gen. 2015, 499, 118.       |
| Rh <sub>2</sub> O <sub>3</sub> /SiO <sub>2</sub> -<br>C500 | 5                       | 50        | 0.6         | 99          | 99          | Chem. Eng. J. 2025, 511, 162072            |
| Ru/MgO                                                     | 50                      | 150       | -           | 99.9        | 92          | J. Catal. 2014, 311, 357.                  |
| Ru/NHPC                                                    | 10                      | 100       | -           | 97          | 98          | Green Chem. 2016, 18, 6082.                |
| Ru/Al <sub>2</sub> O <sub>3</sub>                          | 70                      | 160       | 2           | 100         | 99.1        | RSC Adv. 2020, 10, 11039.                  |
| Ru/CuC                                                     | 20                      | 80        | 2           | 99.6        | 99.9        | Nano Research 2016, 9, 2632.               |
| Au <sub>0.9</sub> Pd <sub>0.1</sub> /CNR                   | 20                      | 100       | -           | 92.6        | 99.9        | J. Mater. Chem. A 2017, 5, 25314.          |
| Au/HAS-TiO <sub>2</sub>                                    | 20                      | 60        | 3           | 100         | 100         | J. Am. Chem. Soc. 2012, 134, 17592.        |
| Ir/α-MoC                                                   | 30                      | 120       | 1           | 81          | 99          | Natl. Sci. Rev.2022, 9.                    |

**Table S3.** Effect of solvents on the selective hydrogenation of quinoline using Ru/CaCO<sub>3</sub>.

| Entry <sup>a</sup> | Solvent     | Con. (%) | Sel. (%) |
|--------------------|-------------|----------|----------|
| 1                  | Water       | 99.4     | 99.9     |
| 2                  | MeOH        | 2.7      | 97.3     |
| 3                  | EtOH        | 39.6     | 98.1     |
| 4                  | Isopropanol | 2.8      | 96.8     |
| 5                  | THF         | 11.0     | 91.2     |
| 6                  | MeCN        | 1.1      | 98.9     |
| 7                  | 1,4-Dioxane | 6.5      | 97.8     |

<sup>a</sup> Reaction conditions: 30 mg substrate, 20 mg Ru/CaCO<sub>3</sub>, 4 mL solvent, 70 °C, 4 bar H<sub>2</sub>, 4 h, 800 r/min.
